# Supplementary material
Source: PubMed Central journal article supplement (PMC3662331)
Supplement: supp_WNL.0b013e31828f18d8_Figure_e-1.pdf [file supp_WNL.0b013e31828f18d8_Figure_e-1.pdf]

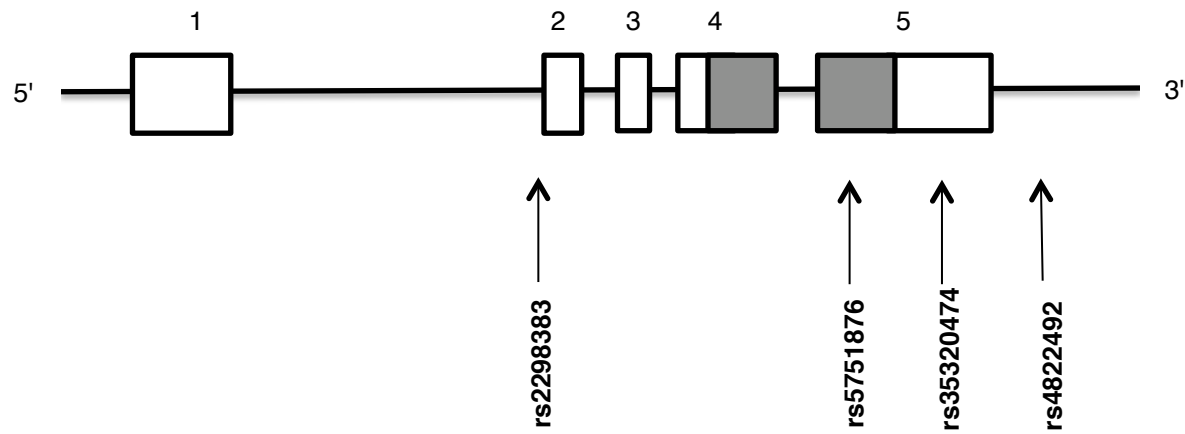

figure *ADORA2A* gene structure.  
 Genomic organization of the *ADORA2A* gene (NM\_000675). SNP positions are indicated by arrows. Empty box and filled box represent non-coding and coding regions, respectively. Numbers above the boxes represent those of exons.
